# Supplementary material for: Establishment of an ovarian cancer omentum metastasis-related prognostic model by integrated analysis of scRNA-seq and bulk RNA-seq
Source: PubMed Central journal article supplement (PMC9686070; doi:10.1186/s13048-022-01059-0), 2022-11-23

PC\_1

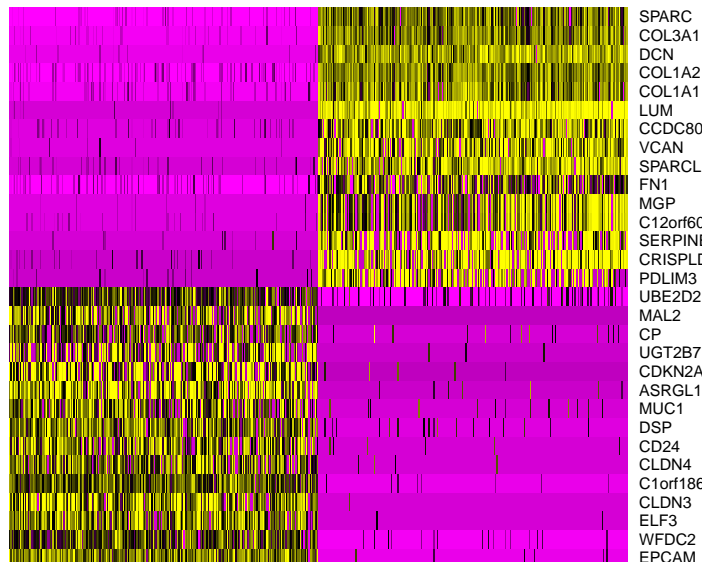

PC\_2

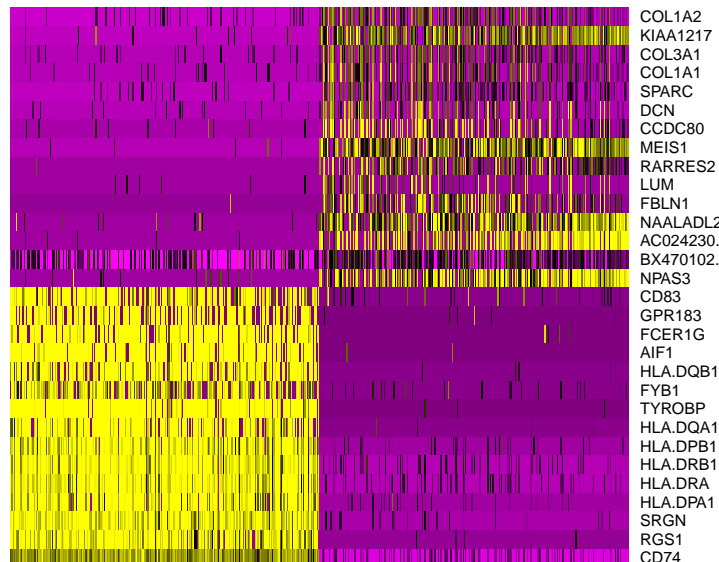

PC\_3

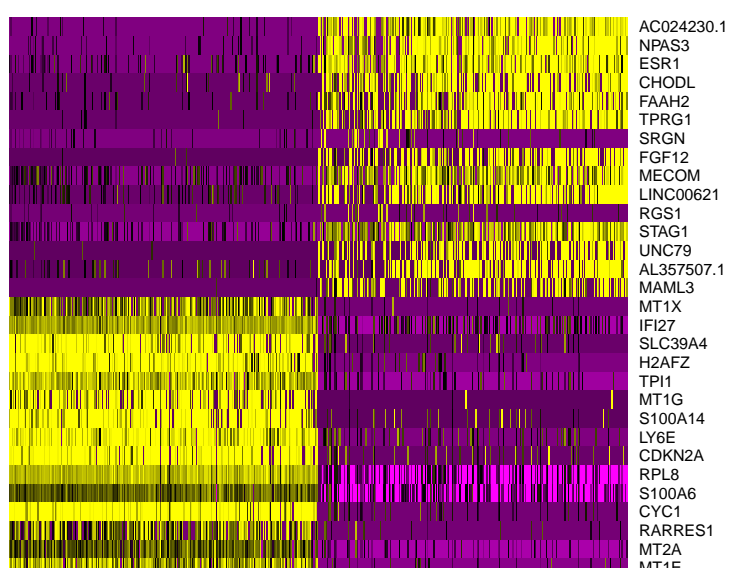

PC\_4

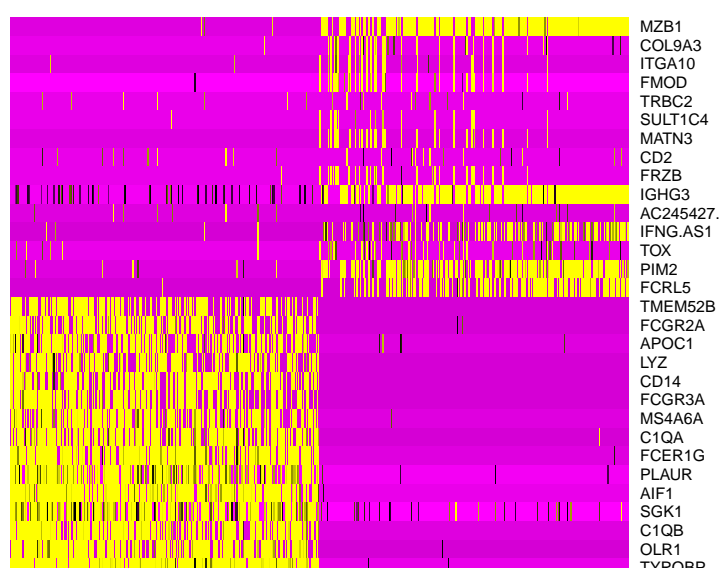

PC\_5

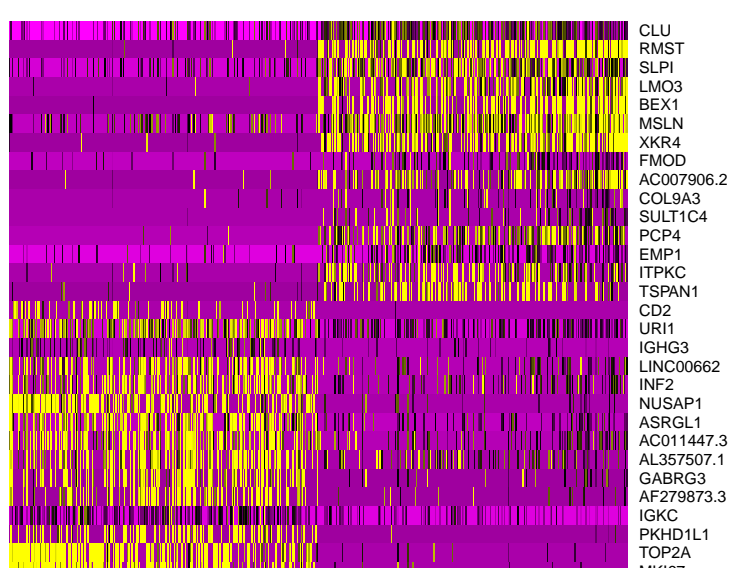

PC\_6

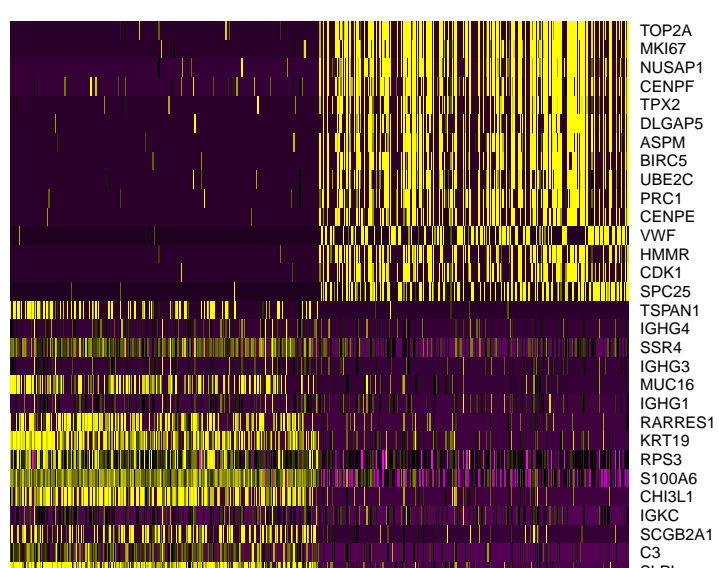

PC\_7

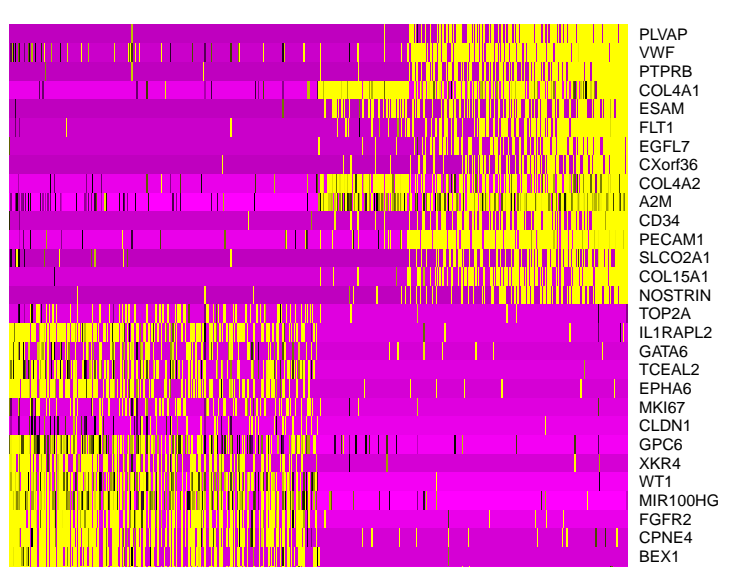

PC\_8

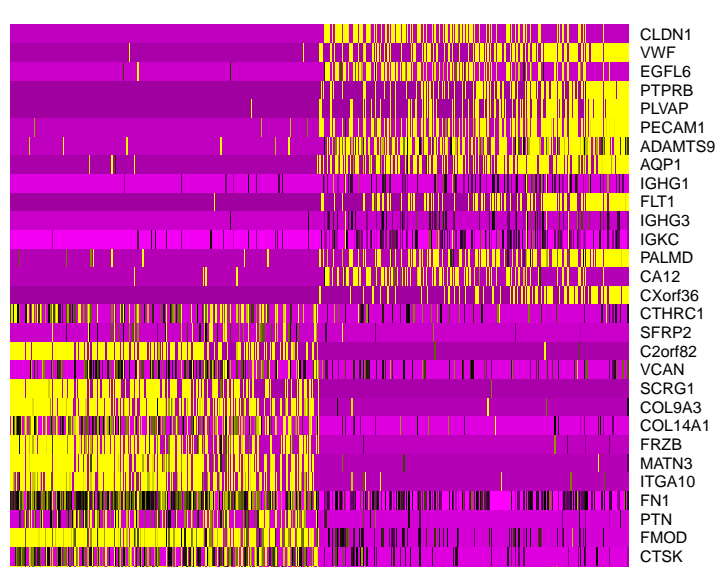

PC\_9

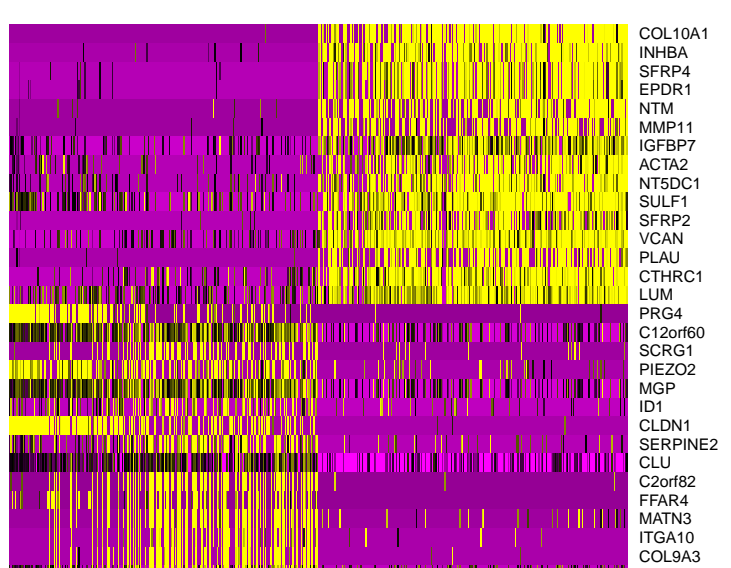

PC\_10

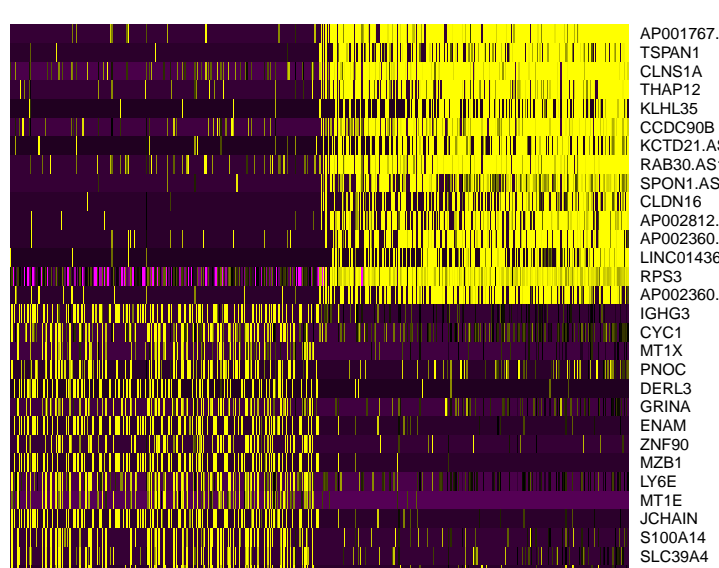

PC\_11

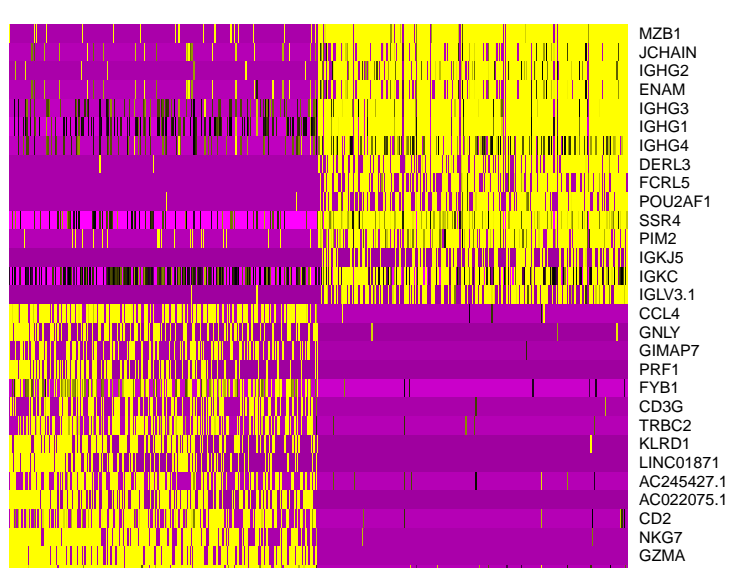

PC\_12

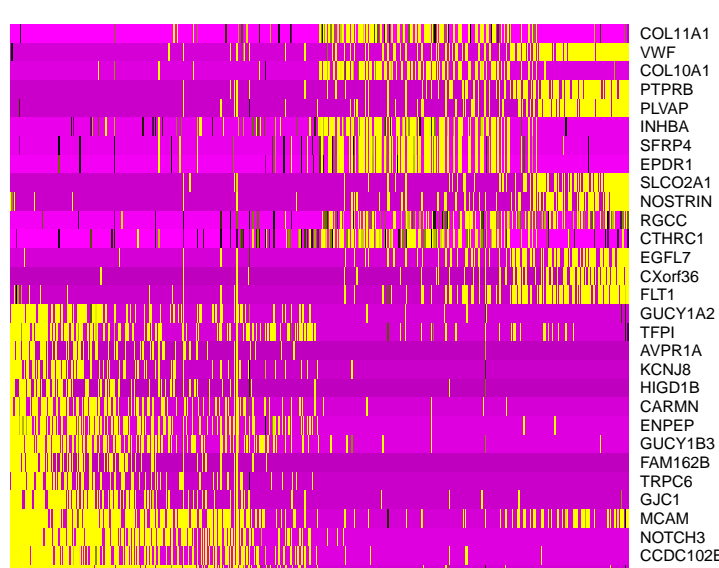

PC\_13

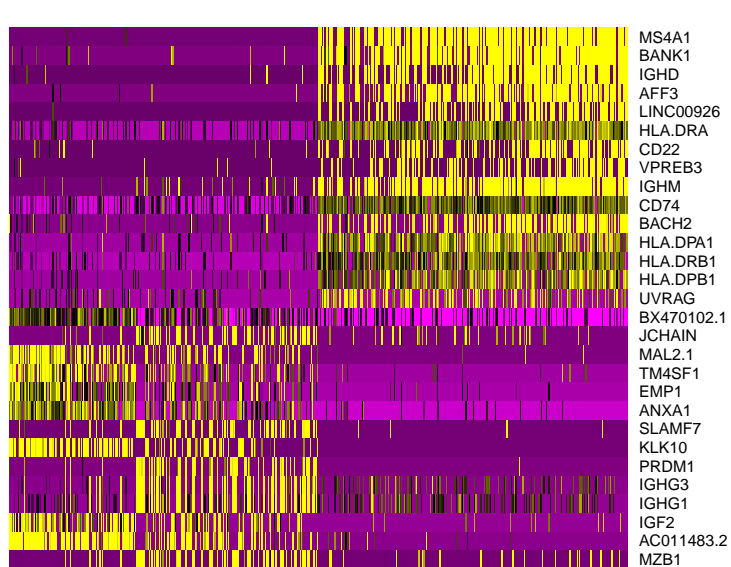

PC\_14

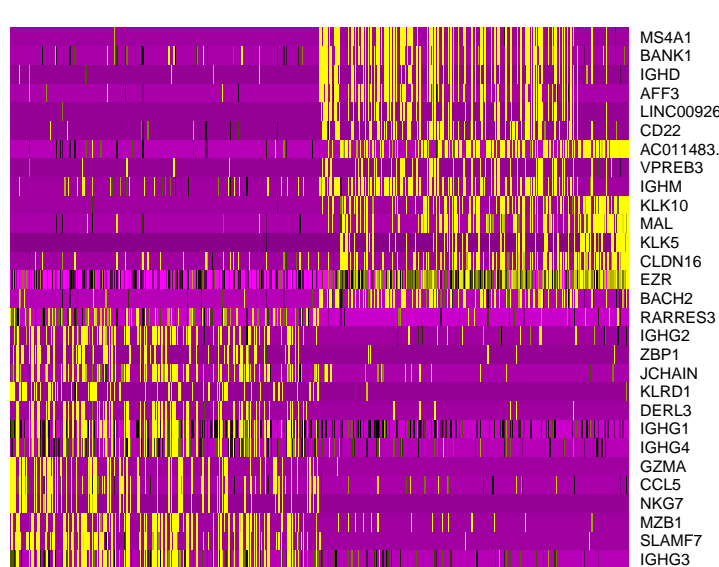

PC\_15

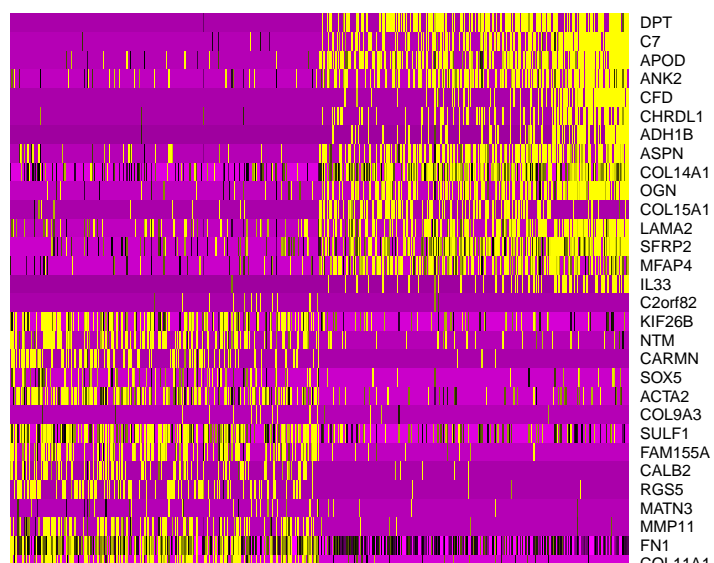

PC\_16

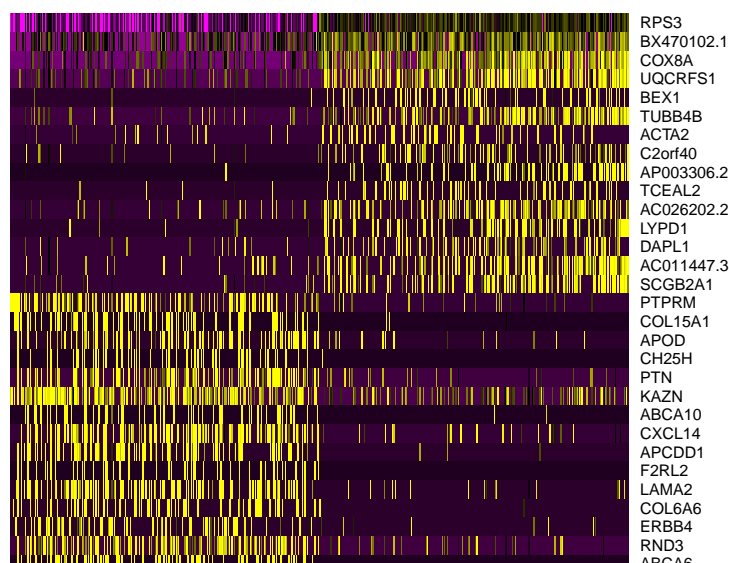

PC\_17

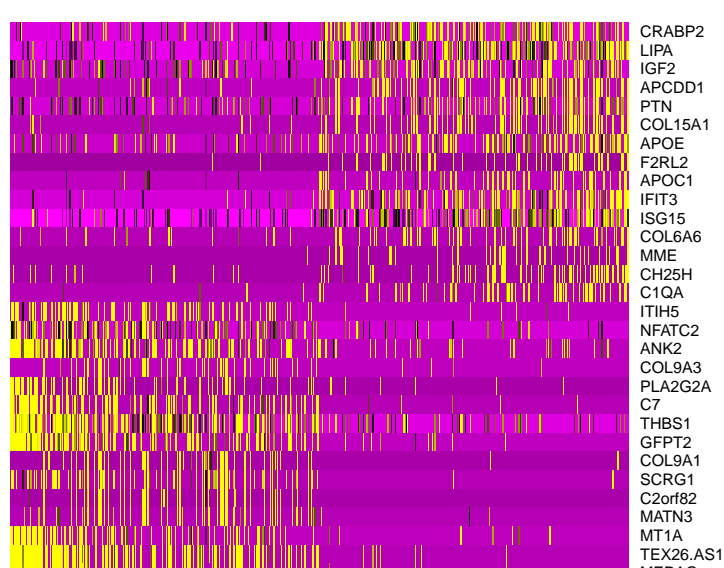

PC\_18

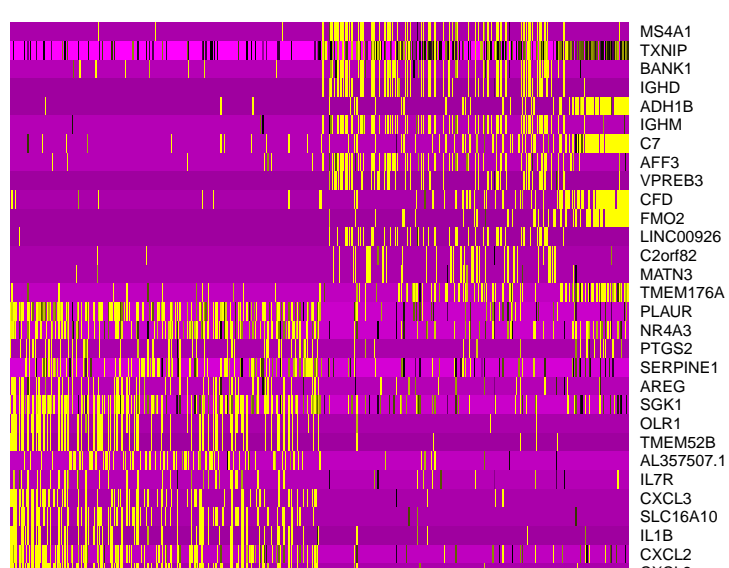

PC\_19

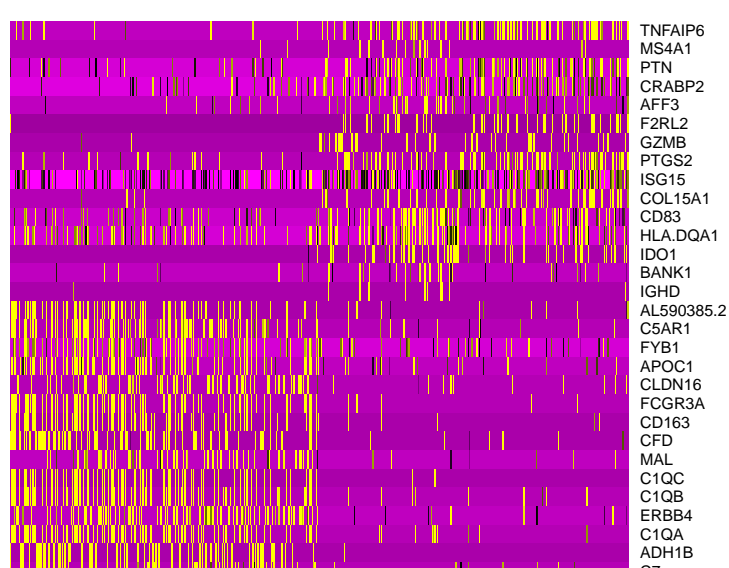

PC\_20

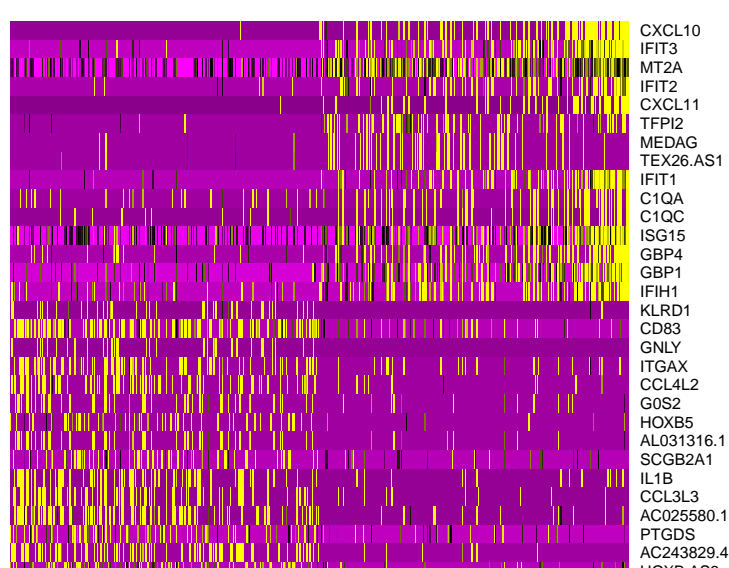

Supplement: 13048_2022_1059_MOESM1_ESM.pdf [file 13048_2022_1059_MOESM1_ESM.pdf]
