# Supplementary material for: Establishment of an ovarian cancer omentum metastasis-related prognostic model by integrated analysis of scRNA-seq and bulk RNA-seq
Source: PubMed Central journal article supplement (PMC9686070; doi:10.1186/s13048-022-01059-0), 2022-11-23

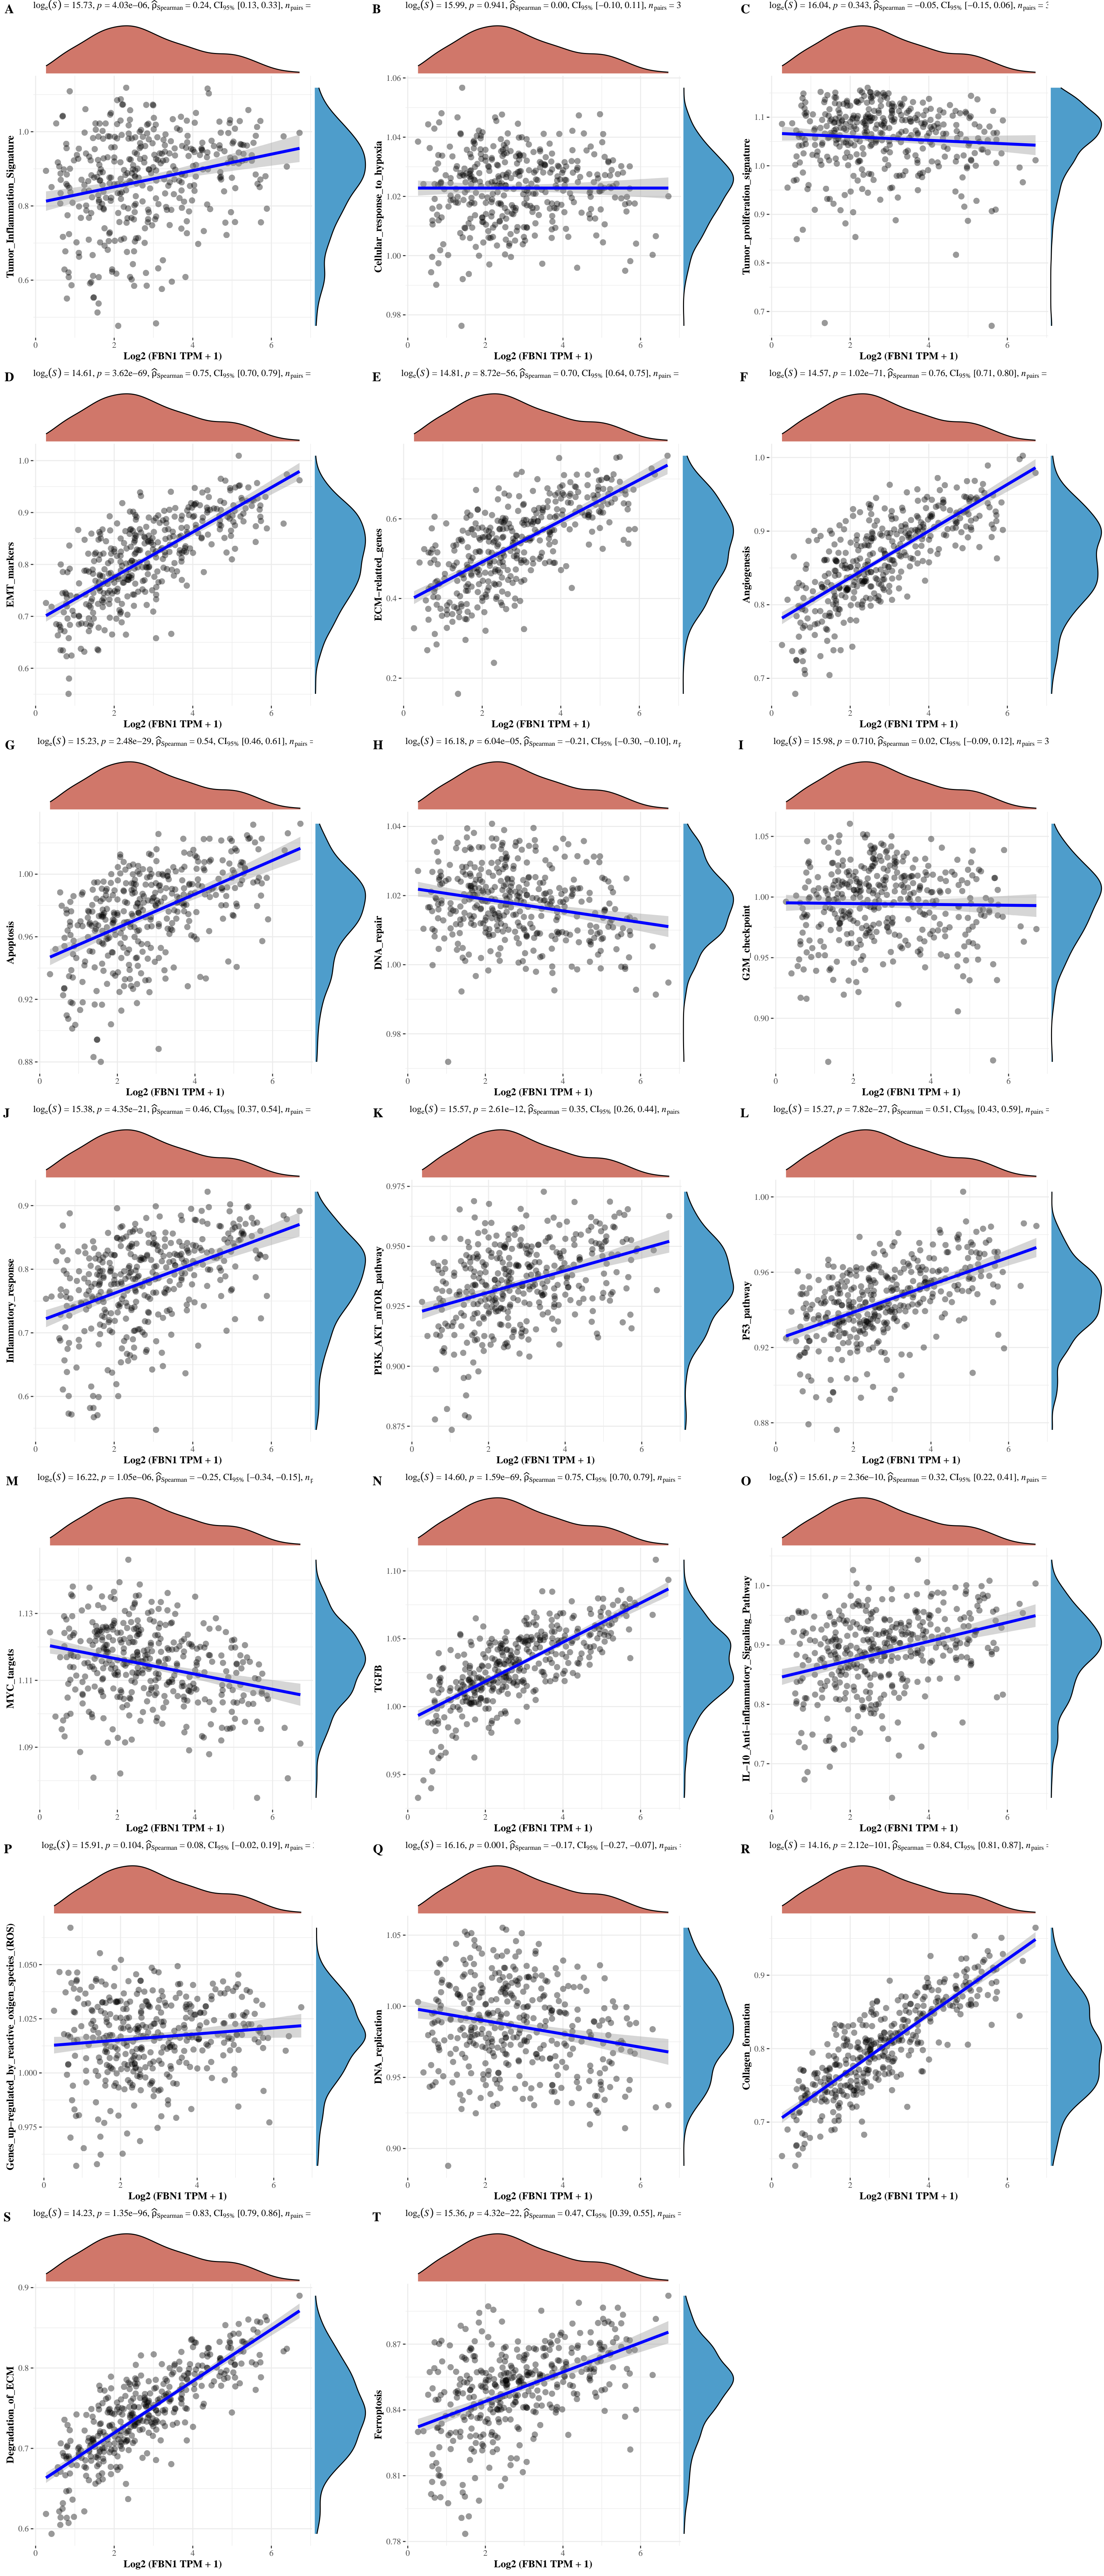

Supplement: 13048_2022_1059_MOESM4_ESM.pdf [file 13048_2022_1059_MOESM4_ESM.pdf]
